# Supplementary material for: Family Conferences for Communicating Difficult News by Medical Residents Through the Lens of the SPIKES Protocol
Source: Research Square preprint supplement (doi:10.21203/rs.3.rs-8339327/v1), 2026-01-22
Supplement: Supplementary file 1 [file 2ad781c2fae57c0ce33043f0.docx]

# Additional file 2. Questionnaire for medical residents

**Title: Questionnaire for Medical Residents on Participation in Family Conferences**
**Description:** This questionnaire was developed by the authors to assess prior experience, training, and perceived challenges of medical residents in conducting family conferences for communicating difficult news. The instrument has been used exclusively for this study and has not been previously published.

Questionnaire for Medical Residents

Case No.: ___________

Initials: ___________ Age: ___________

Previous experience with family conferences

1. Have you ever participated in a family conference before?

( ) Yes ( ) No

If yes, how many times? ___________

2. During those meetings or conferences, were you:

- An undergraduate medical student (internship/final year)? ( ) Yes ( ) No

- A medical resident? ( ) Yes ( ) No

3. Have you ever conducted a family conference independently?

( ) Yes ( ) No

If yes, how many times? ___________

4. At that time, were you a medical resident?

( ) Yes ( ) No

Perceived difficulties

5. What were the most difficult aspects and challenges encountered during the meeting with the family?

_________________________________________________________________________________________________________

_________________________________________________________________________________________________________

__________________________________________________________________________________________________________________________________________________________________________________________________________________

Training in family conferences

6. Have you received any training to conduct family conferences?

( ) Yes ( ) No

7. If yes, please specify the type and duration of the training:

Duration:

_____ hour(s) _____ month(s) _____ year(s)

8. Which teaching–learning strategies were used?

( ) Didactic lecture

( ) Role-play

( ) Seminar

( ) Simulations

( ) Other (please specify):

_________________________________________________________________________________________________________
